# Supplementary material
Source: publisher site journal article supplement (https://www.spandidos-publications.com/1670/downloadSupplementary)
Supplement: Supplementary file 1 [file downloadSupplementary]

### Legends for Videos

Video S1. During endoscopic procedure for case 1, a great amount of thick, purulent mucus was revealed emerging from the pancreatic duct after stenting.

Video S2. During endoscopic procedure for case 2, a great amount of pancreatic juice and solid debris flowed out from the pancreatic duct after the insertion of the guidewire.
